# Supplementary material
Source: publisher figshare collection journal article supplement (https://sage.figshare.com/ndownloader/files/17512241)
Supplement: Supplementary file 2 [file 17512241]

Archive with 2 entries (2 files):
- Form 1_Expenses.pdf
- Form 2_WPAI.pdf
